# Supplementary material for: Induction of Extracellular Hydroxyl Radicals Production in the White-Rot Fungus Pleurotus eryngii for Dyes Degradation: An Advanced Bio-oxidation Process
Source: MDPI journal article supplement (doi:10.3390/jof10010052), 2024-01-07
Supplement: s1 [file s1]

# Induction of Extracellular Hydroxyl Radicals Production in the White-Rot Fungus *Pleurotus eryngii* for Dyes Degradation: An Advanced Bio-oxidation Process

**Table S1.** Dyes used in the present study, showing their names and abbreviations, chemical structures, and absorption maxima in the visible spectrum, determined at pH 2.

| Type          | Name (abbreviation), $\lambda_{\text{max}}$                                                                                  | Name (abbreviation), $\lambda_{\text{max}}$                                                                                  | Name (abbreviation), $\lambda_{\text{max}}$                                                                                  |
|---------------|------------------------------------------------------------------------------------------------------------------------------|------------------------------------------------------------------------------------------------------------------------------|------------------------------------------------------------------------------------------------------------------------------|
| Anthraquinone | <b>Acid Black 48 (AB48), 657 nm</b><br>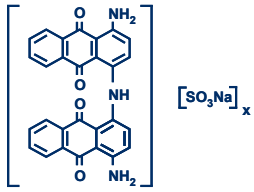     | <b>Acid Blue 45 (AB45), 587 nm</b><br>     | <b>Acid Green 25 (AG25), 608 nm</b><br>   |
|               | <b>Reactive Blue 19 (RB19), 592 nm</b><br>  |                                                                                                                              |                                                                                                                              |
| Azo           | <b>Acid Red 88 (AR88), 502 nm</b><br>     | <b>Acid Yellow 17 (AY17), 402 nm</b><br> | <b>Chromotrope 2R (C2R), 505 nm</b><br> |
|               | <b>Crocein Orange G (COG), 480 nm</b><br> | <b>Methyl Orange (MO), 474 nm</b><br>    | <b>New Coccine (NC), 506 nm</b><br>     |
|               | <b>Orange II (OI), 485 nm</b><br>         | <b>Tartrazine (TA), 427 nm</b><br>       | <b>Tropaeolin O (TO), 388 nm</b><br>    |

Table S1. Continuation.

| Type                  | Name (abbreviation), $\lambda_{\max}$                                                                                      | Name (abbreviation), $\lambda_{\max}$                                                                                                | Name (abbreviation), $\lambda_{\max}$                                                                                       |
|-----------------------|----------------------------------------------------------------------------------------------------------------------------|--------------------------------------------------------------------------------------------------------------------------------------|-----------------------------------------------------------------------------------------------------------------------------|
| Diazo                 | <b>Acid Black 24 (AB24), 608 nm</b><br>   | <b>Acid Blue 113 (AB113), 549 nm</b><br>           | <b>Acid Orange 63 (AO63), 425 nm</b><br> |
|                       | <b>Ponceau SS (PSS), 513 nm</b><br>       | <b>Reactive Black 5 (RB5), 596 nm</b><br>          |                                                                                                                             |
| Heterocycle           | <b>Azure B (AB), 645 nm</b><br>           | <b>Neutral Red (NR), 530 nm</b><br>                 |                                                                                                                             |
| Indigo Phthalocyanine | <b>Indigo Carmine (IC), 609 nm</b><br>  | <b>Iron(III)phthalocyanine (I3P), 631 nm</b><br> |                                                                                                                             |
| Triarylmethane        | <b>Brilliant Green (BG), 624 nm</b><br> | <b>Bromophenol Blue (BB), 436 nm</b><br>          | <b>Cresol Red (CR), 434 nm</b><br>     |
|                       | <b>Crystal Violet (CV), 597 nm</b><br>  | <b>Methyl Blue (MB), 601 nm</b><br>              |                                                                                                                             |

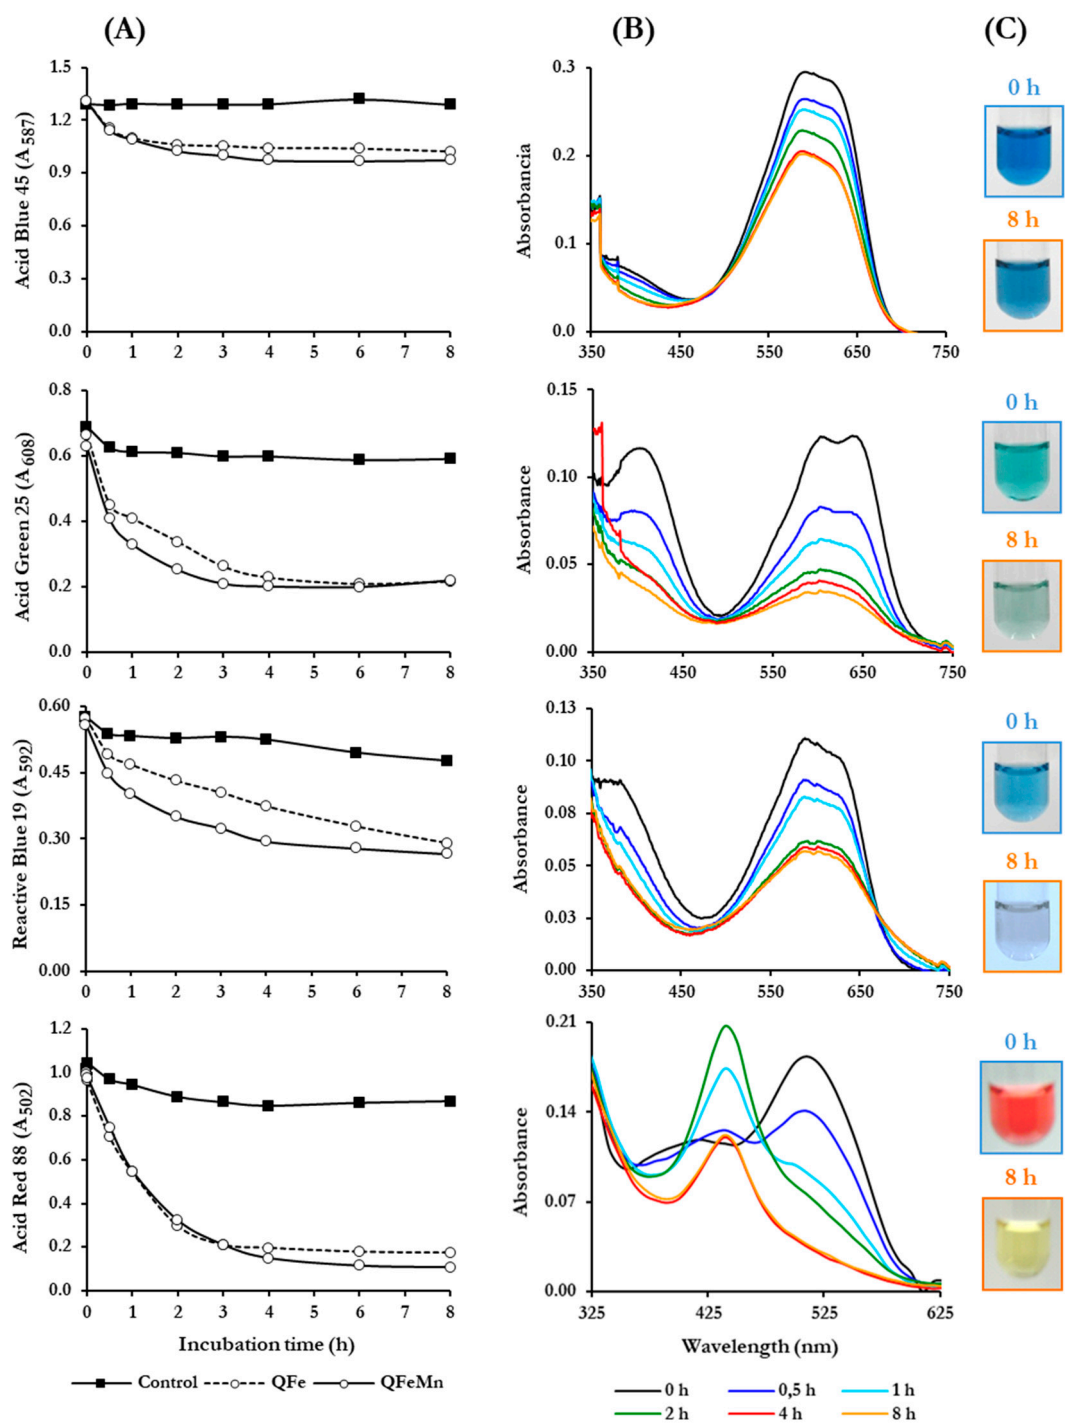

**Figure S1. Advanced oxidation of dyes by *P. eryngii*.** (A) Time course of decolourisation at  $\lambda_{\text{max}}$  of each dye; (B) changes in visible spectra of diluted samples from incubations with  $\text{Mn}^{2+}$  along the incubation time; (C) pictures of QFeMn incubation samples taken at 0 and 8 hours. Incubations contained 7-day-old washed mycelium ( $50 \pm 5$  mg, dry weight), 30 ml of 20 mM phosphate buffer, pH 5.0, dyes 50  $\mu\text{M}$ , DBQ 500  $\mu\text{M}$ ,  $\text{Fe}^{3+}$  100  $\mu\text{M}$ -Oxalate 300  $\mu\text{M}$  (incubation QFe) and  $\text{Mn}^{2+}$  100  $\mu\text{M}$  (incubation QFeMn). Control incubations lacked DBQ, iron complex and  $\text{Mn}^{2+}$ .



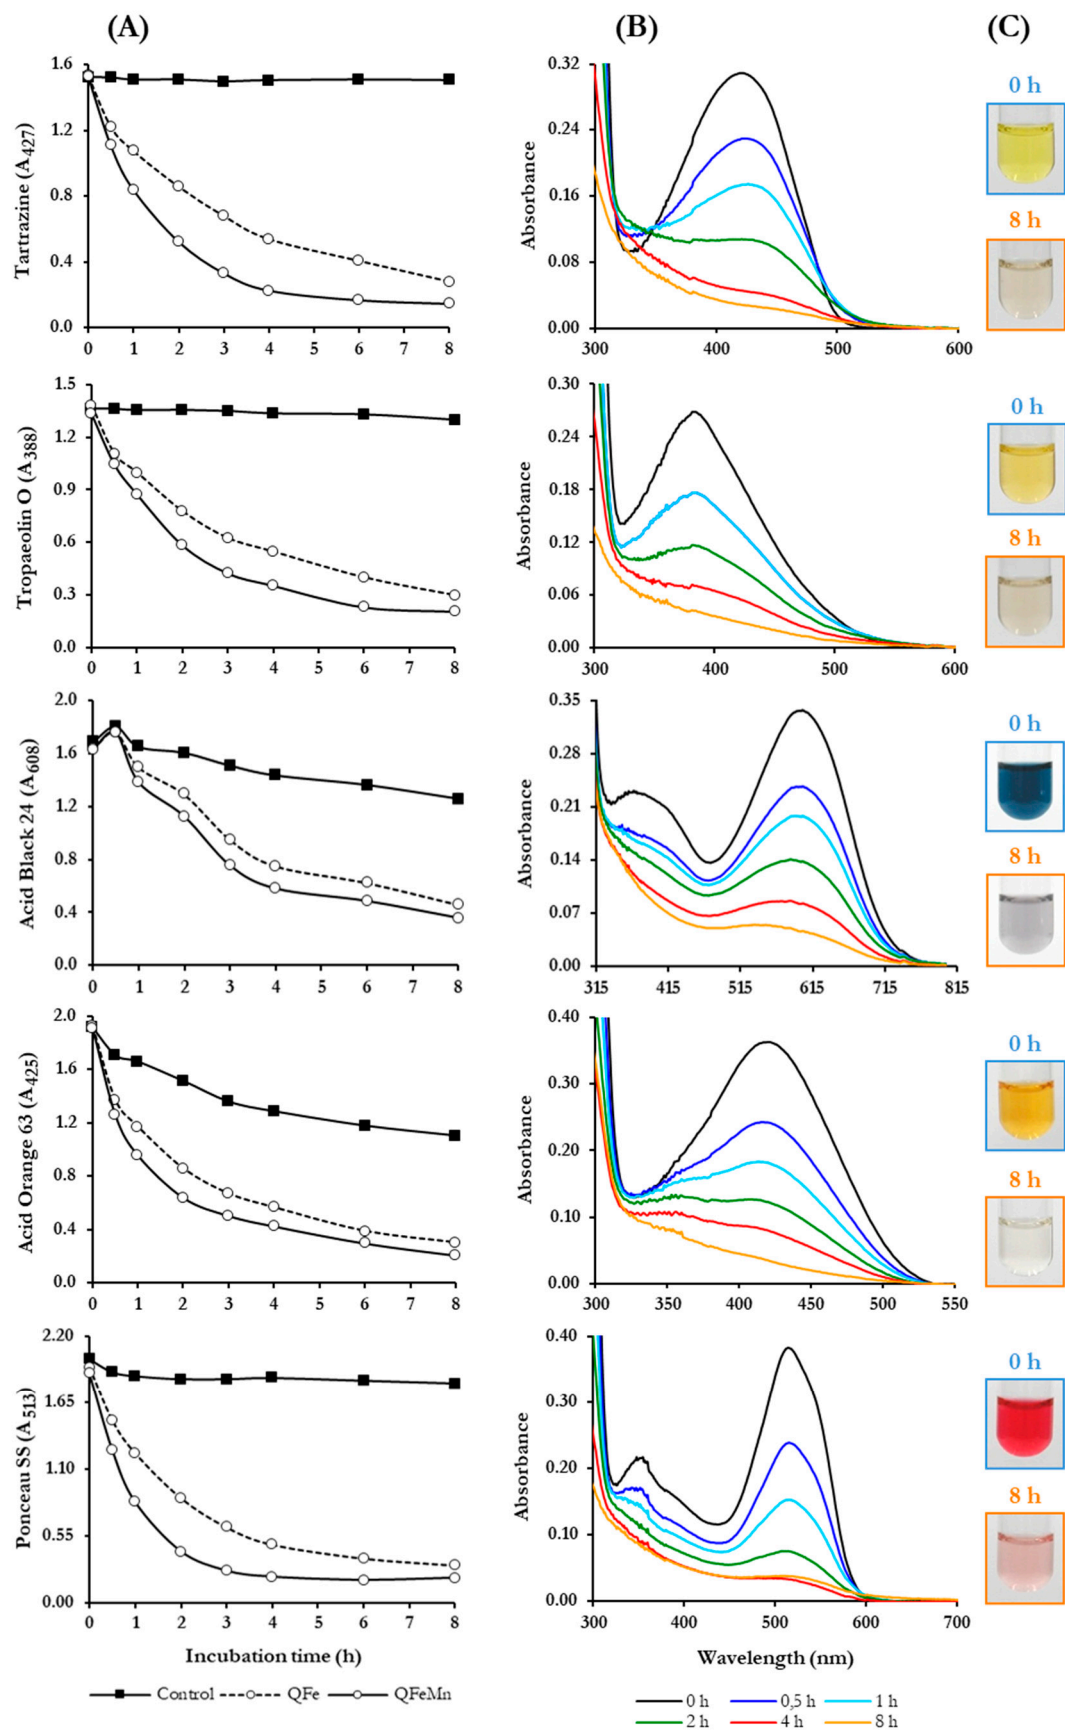

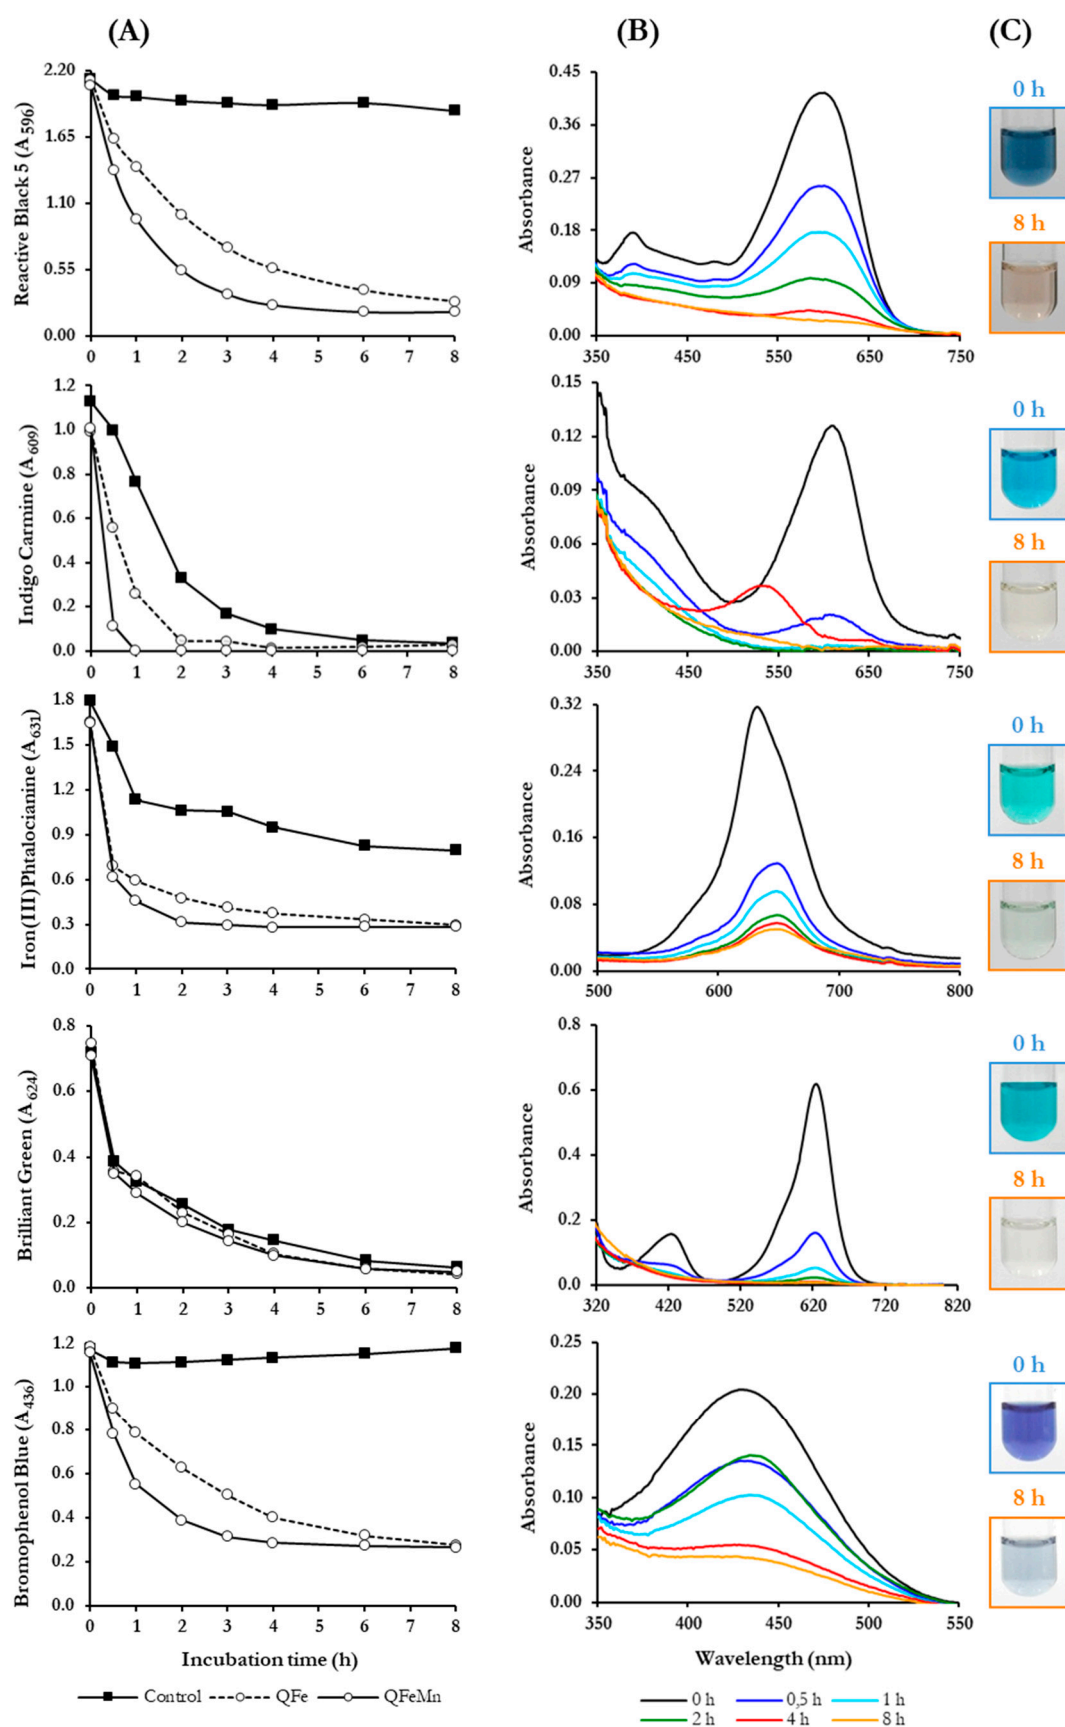

Figure S1. Continuation.

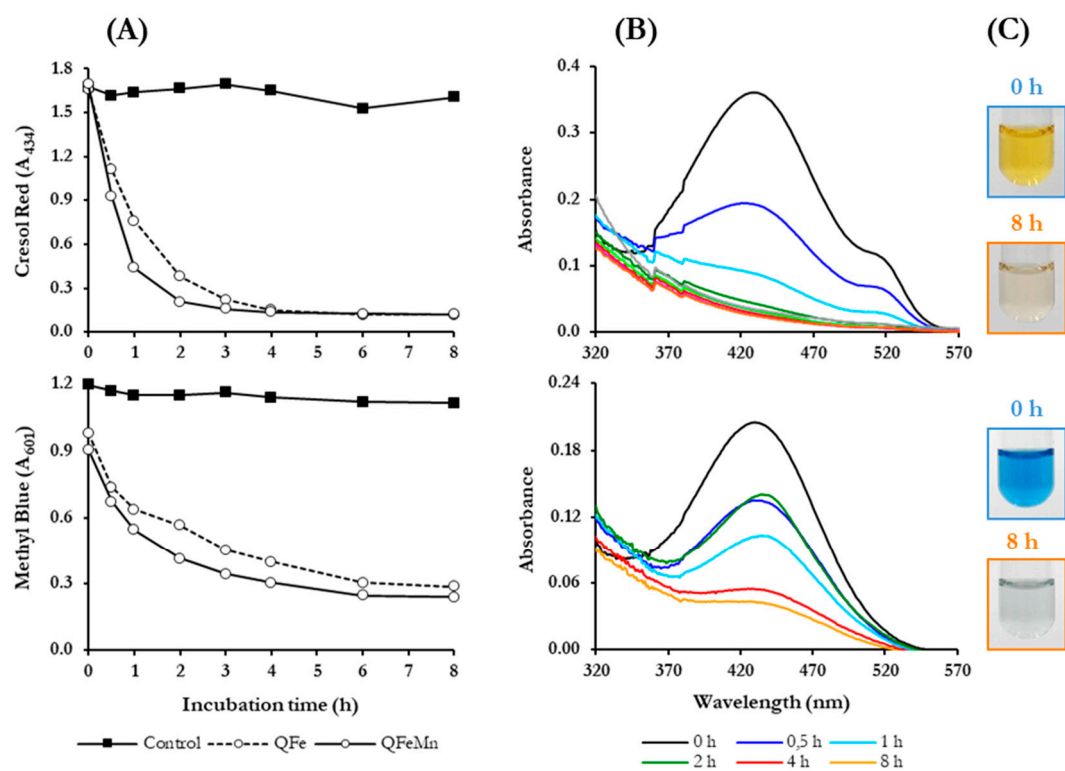

Figure S1. Continuation.



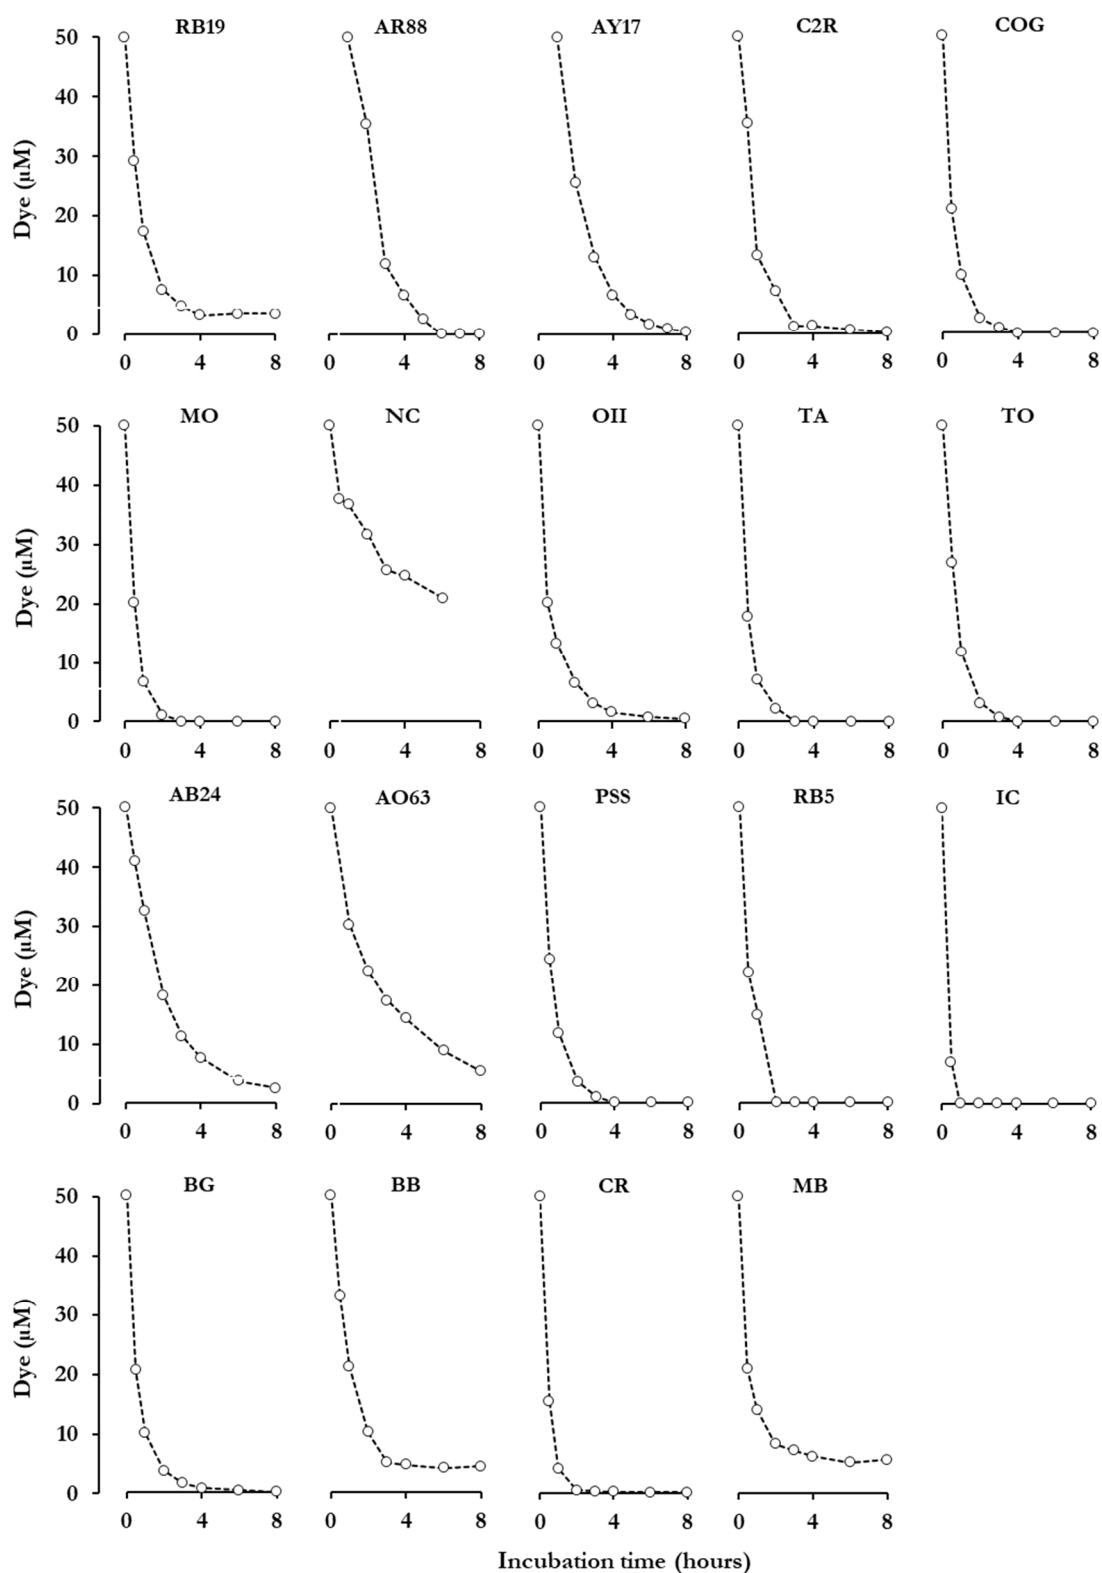

**Figure S2. Advanced biooxidation of dyes by *P.eryngii*, analysed by HPLC.** Incubations contained 7-day-old washed mycelium ( $50 \pm 5$  mg, dry weight), 30 ml of 20 mM phosphate buffer, pH 5.0, dyes 50  $\mu$ M, DBQ 500  $\mu$ M,  $\text{Fe}^{3+}$  100  $\mu$ M-Oxalate 300  $\mu$ M and  $\text{Mn}^{2+}$  100  $\mu$ M (QFeMn incubation). Control incubations, which lacked DBQ, iron complex and  $\text{Mn}^{2+}$ , were analysed spectrophotometrically and the results are shown in Figure S1.
